# Supplementary material for: An Insecticidal Compound Produced by an Insect-Pathogenic Bacterium Suppresses Host Defenses through Phenoloxidase Inhibition
Source: PubMed Central journal article supplement (PMC6271226; doi:10.3390/molecules191220913), 2014-12-12

## Supplementary Materials

**Figure S1.** A schematic presentation of the compound purification from *Photorhabdus temperata* M1021. **(A)** A flow sheet the process followed during the solvent-solvent extraction. Finally the M1 compound obtained from the MeOH/EtOAc (100:0 v/v) was subjected to thin-layer (TLC) chromatography. **(B)** TLC plates of fractions M 1 to M 11 were run on TLC plates and visualized under 254 nm.

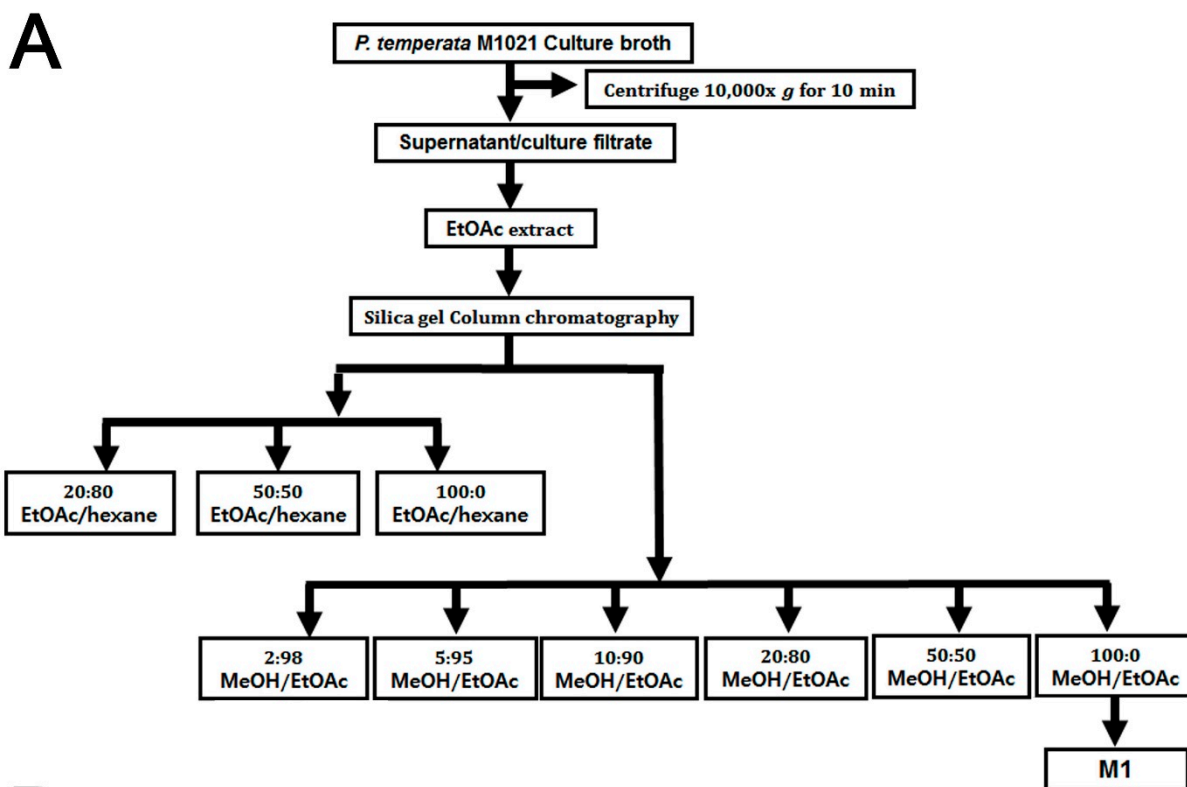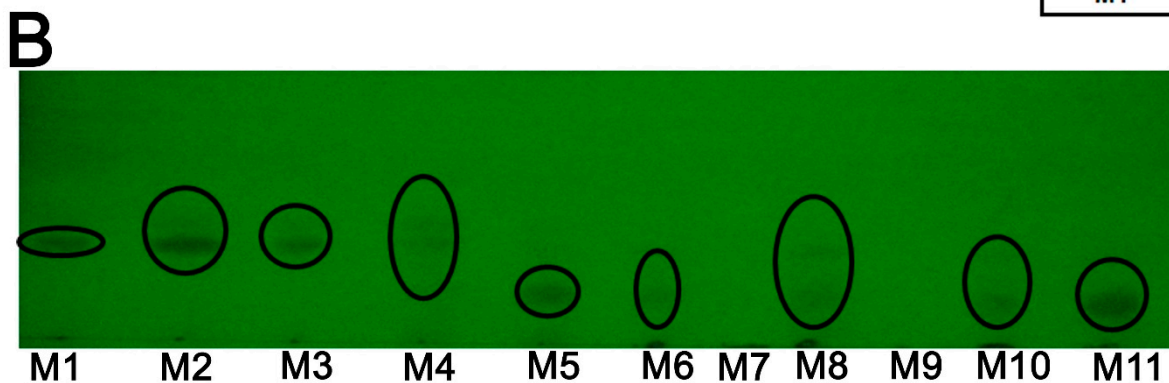

**Figure S2.** Proton NMR ( $^1\text{H-NMR}$ ) at 500 MHz of the compound **1**. The compound was purified from *Photorhabdus temperata* M1021 through different chromatographic techniques. Finally the compound was identified through  $^1\text{H-}$ , and  $^{13}\text{C-NMR}$ .

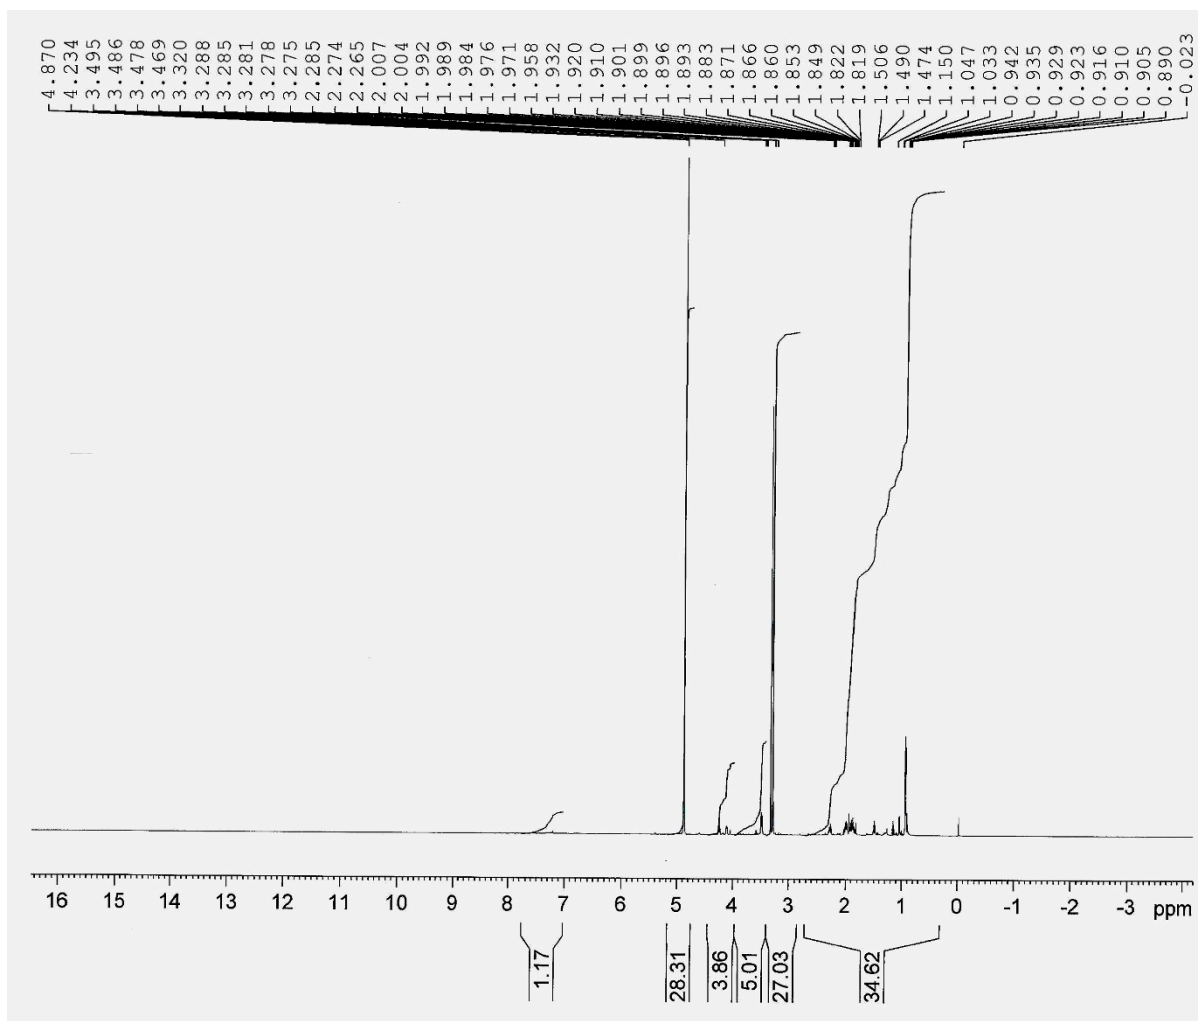

**Figure S3.** Carbon NMR ( $^{13}\text{C}$ -NMR) at 500 MHz of the compound **1**. The compound was purified from *Photorhabdus temperata* M1021 through different chromatographic techniques. Finally the compound was identified through  $^1\text{H}$ -, and  $^{13}\text{C}$ -NMR.

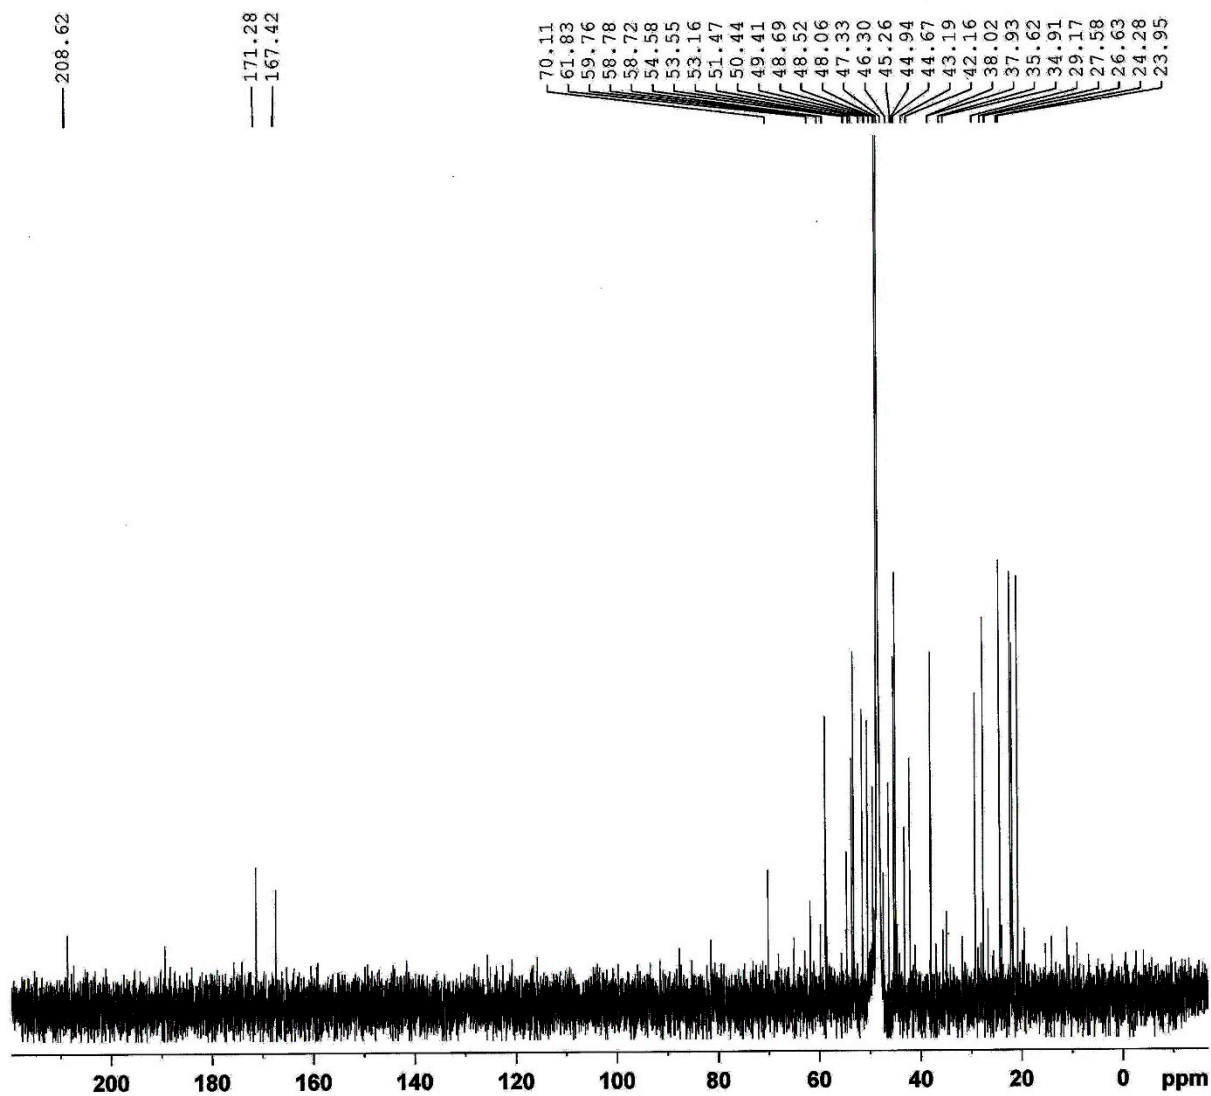

Supplement: molecules-19-20913-s001.pdf [file molecules-19-20913-s001.pdf]
